# Supplementary material for: Peripheral Blood Mean Platelet Volume and the Ratio of Mean Platelet Volume to Platelet Count as Prognostic Biomarkers in Patients with Cutaneous Angiosarcoma of the Head and Neck: A Retrospective Cohort Study
Source: PubMed Central journal article supplement — Acta Derm Venereol. 2024 Nov 7;104:42227. doi: 10.2340/actadv.v104.42227 (PMC11559261; doi:10.2340/actadv.v104.42227), 2024-11-07
Supplement: ActaDV-104-42227-s1.pdf [file ActaDV-104-42227-s1.pdf]

Supplementary material has been published as submitted. It has not been copyedited, or typeset by Acta Dermato-Venereologica

Table SI. Characteristics of 45 patients with cutaneous angiosarcoma of the head and neck: Comparison between the low-MPV group (<10 fL) and the high-MPV group ( $\geq 10$  fL)

| Attribute                         | Patient group (%) |                       |                               | p-value* |
|-----------------------------------|-------------------|-----------------------|-------------------------------|----------|
|                                   | Total             | Low MPV<br>(MPV<10.0) | High MPV<br>(MPV $\geq$ 10.0) |          |
| Patients (%)                      | 45 (100%)         | 26 (57.8)             | 19 (42.2)                     |          |
| Age                               |                   |                       |                               | 0.738    |
| median [IQR]                      | 76 [67-81]        | 75.5 [59-88]          | 76 [53-76]                    |          |
| min-max                           | 53-86             | 59-86                 | 53-86                         |          |
| Sex                               |                   |                       |                               | 0.329    |
| male                              | 33 (73.3)         | 20 (76.9)             | 13 (68.4)                     |          |
| female                            | 12 (26.7)         | 6 (23.1)              | 6 (31.6)                      |          |
| ECOG-PS score                     |                   |                       |                               | 0.627    |
| 0-1                               | 41 (91.1)         | 23 (88.5)             | 18 (94.7)                     |          |
| 2-4                               | 4 (8.9)           | 3 (11.5)              | 1 (5.3)                       |          |
| Primary site                      |                   |                       |                               | 1.00     |
| Head                              | 43 (95.6)         | 25 (96.2)             | 18 (94.7)                     |          |
| Face                              | 2 (4.4)           | 1 (3.8)               | 1 (5.3)                       |          |
| Tumor size                        |                   |                       |                               | 0.770    |
| <5cm                              | 25 (55.6)         | 15 (57.7)             | 10 (52.6)                     |          |
| $\geq$ 5cm                        | 20 (44.4)         | 11 (42.9)             | 9 (47.4)                      |          |
| Number of skin lesions            |                   |                       |                               | 0.559    |
| single                            | 19 (42.2)         | 12 (46.2)             | 7 (36.8)                      |          |
| multiple                          | 26 (57.8)         | 14 (53.8)             | 12 (63.2)                     |          |
| Lymph node metastasis             |                   |                       |                               | 1.00     |
| absent                            | 41 (91.1)         | 24 (92.3)             | 17 (89.5)                     |          |
| present                           | 4 (8.9)           | 2 (7.7)               | 2 (10.5)                      |          |
| Distant metastasis                |                   |                       |                               | 1.00     |
| absent                            | 41 (91.1)         | 24 (92.3)             | 17 (89.5)                     |          |
| present                           | 4 (8.9)           | 2 (7.7)               | 2 (10.5)                      |          |
| 1 <sup>st</sup> line chemotherapy |                   |                       |                               | 0.182    |
| paclitaxel                        | 32 (71.1)         | 18 (69.2)             | 14 (73.7)                     |          |
| docetaxel                         | 2 (4.4)           | 0 (0)                 | 2 (10.5)                      |          |

|                    |           |           |           |       |
|--------------------|-----------|-----------|-----------|-------|
| IL-2               | 11 (24.4) | 8 (30.8)  | 3 (15.8)  |       |
| Surgery for ASHN   |           |           |           | 1.00  |
| absent             | 33 (73.3) | 19 (73.1) | 14 (73.7) |       |
| present            | 12 (26.7) | 7 (26.9)  | 5 (26.3)  |       |
| Radiation for ASHN |           |           |           | 0.306 |
| absent             | 12 (26.7) | 5 (19.2)  | 7 (36.8)  |       |
| present            | 33 (73.3) | 21 (80.8) | 12 (63.2) |       |
| Outcome            |           |           |           | 1.00  |
| alive              | 21 (46.7) | 12 (46.2) | 9 (47.4)  |       |
| dead               | 24 (53.3) | 14 (53.8) | 10 (52.6) |       |

ASHN, angiosarcoma of the head and neck; ECOG-PS, Eastern Cooperative Oncology Group performance; IL-2, interleukin-2; IQR, interquartile range; MPV, mean platelet volume.

\*statistically significant:  $p < 0.05$

**Table SII. Multivariate analysis using Cox proportional hazards: The multivariate model shows MPV/PC values exceeding 0.06 to be an independent factor for poor prognosis of OS (HR: 3.90, 95% CI: 1.23-12.4, Cox proportional hazards model;  $p$ -value\* = 0.021)**

|                        | Hazard ratio | 95% CI for hazard ratio | $p$ -value*  |
|------------------------|--------------|-------------------------|--------------|
| MPV/PLT $\geq 0.06$    | 3.898        | 1.23-12.39              | <b>0.021</b> |
| Age                    | 1.031        | 0.979-1.086             | 0.242        |
| Tumor size $\geq 5$ cm | 0.683        | 0.271-1.721             | 0.418        |

CI, confidence interval; HR, hazard ratio; MPV, mean platelet volume; OS, overall survival; PC, platelet count.

\*statistically significant:  $p < 0.05$
